James C. Eisenach, M.D., Editor

***A History of Anaesthesia through Postage Stamps.*** By Alistair G. McKenzie, B.Pharm., M.B., Ch.B., F.R.C.A. Maclean Dubois, Hillend House, Hillend, Edinburgh, 2000. Pages: 146. Price: \$15.00 (£ 9.50).

THEMATIC philately is, in my view, an art form rather than a science. The task of presenting a history or a retrospective on any given topic through postage stamps seems daunting to me for several reasons. First, when scrutinized, it is clear that not every—or even many—specific signal events in the history may have been noticed by those who produce postage stamps. Second, many stamps are produced by nations unknown to most of the world's population (*i.e.*, Comoro, Transki, Rwanda, Malagasy and Wallis and Fortuna Is), especially for philatelists, not for postage but as a source of revenue. Third, at least in the United States, a person (no matter how important or famous) must have died a minimum of 10 yr prior to being recognized *via* a stamp, so recent US history cannot be reviewed by this means.

McKenzie's book deals with these problems very nicely. There are only five anesthesia practitioners recognized in all of the stamps reproduced, but most of the important people, events, and discoveries in the specialty are commemorated by the selection of stamps related—some closely, some remotely—to the person or event. (A 1938 US stamp showing President Franklin Pierce is included because W.T.G. Morton obtained an interview with him!)

As a history of anesthesia, this book serves as a terse synopsis. By recognizing these historical events through postage stamps, the potential audience is enlarged considerably. Any anesthetist who also is a stamp collector is the obvious bull's-eye of the author's intent. It is an easy read, well indexed, referenced, and annotated. The only deficiency, in any opinion, is the reproduction of the many stamps in black-and-white, thus denying the reader one of the main pleasures of philately—the wonderful colors of modern stamps.

**Paul Didier, M.D.**, Emeritus Staff Center, Mayo Clinic, Rochester, Minnesota. [wmsondda@aol.com](mailto:wmsondda@aol.com)

(Accepted for publication July 2, 2002.)

***Conscious Sedation.*** Jeanine P. Wiener-Kronish, M.D., Michael A. Gropper, M.D., Ph.D. Lippincott Williams & Wilkins, Philadelphia, 2000. Pages: 350. Price: \$37.00

THIS 181-page handbook on conscious sedation has 15 contributors who attempt to focus on their own particular clinical practice settings. The idea is sound but the execution is mixed. Each contributor tries to carve out his or her niche in the practice of sedation-analgesia. In doing so they encounter the insurmountable, mostly terminological, problem of conscious sedation. Conscious sedation has been correctly described as an "oxymoron".<sup>1</sup> It is contradictory and especially confusing when the term "conscious" is combined with "sedation." The term does not provide a distinction between the state when the patient remains fully conscious or just does not completely fit a category of unconsciousness. In addition, some of the confusion arises from the lack of objective measures of sedation depth.<sup>2</sup>

The term "conscious sedation" was coined in 1985 to describe lightly sedated dental patients. Its use rapidly spread to various areas of medical practice with the meaning of procedural sedation including all levels of sedation. The ASA Task Force for the establishment of guidelines for monitoring patient sedation by nonanesthesiologists in 1996 replaced conscious sedation with the more precise term "sedation-analgesia," but the confusing "conscious sedation" continues to be widely used and the authors did not attempt to confront this problem.

As is clear from the book chapters, each practice setting has different requirements, and there is no clearly defined end-point of what conscious sedation is. Each contributor clearly emphasizes what it is not supposed to be, that is, deep sedation with its potential hazards. Another weakness of the text is lack of data related to the potent pharmacodynamic interactions that occur with quick acting benzodiazepines, opioids, barbiturates, and propofol. A glaring error is the dose of fentanyl given in mg/kg instead of  $\mu\text{g/kg}$  (page 82).

Overall, however, this handbook is a useful addition to this subject, especially because the demand for the service keeps growing. For the nonanesthesiologist the clearest message is this: Do not go out on a limb from which you cannot be rescued.

**Ronald Vinik, M.D., Igor Kissin, M.D., Ph.D.\*** \*Brigham and Women's Hospital, Boston, Massachusetts. [kissin@zeus.bwh.harvard.edu](mailto:kissin@zeus.bwh.harvard.edu)

## References

1. Murphy MF: Sedation. *Sedation. Ann Emerg Med* 1996; 27:461-3
2. Green SM, Krauss B: Pulmonary aspiration risk during emergency department procedural sedation: An examination of the role of fasting and sedation depth. *Acad Emerg Med* 2002; 9:35-42

(Accepted for publication July 2, 2002)
